# Supplementary material
Source: Springer Nature journal article supplement (https://www.springermedizin.de/resource/supplementary/12884_2013_1001_MOESM4_ESM.pdf/9458742)
Supplement: MOESM4 [file 9458742]

**Graph 2.** Single vaginal birth without instrument 37-42 weeks of pregnancy (wp). Volume-stratum episiotomy rates. Public and private hospitals

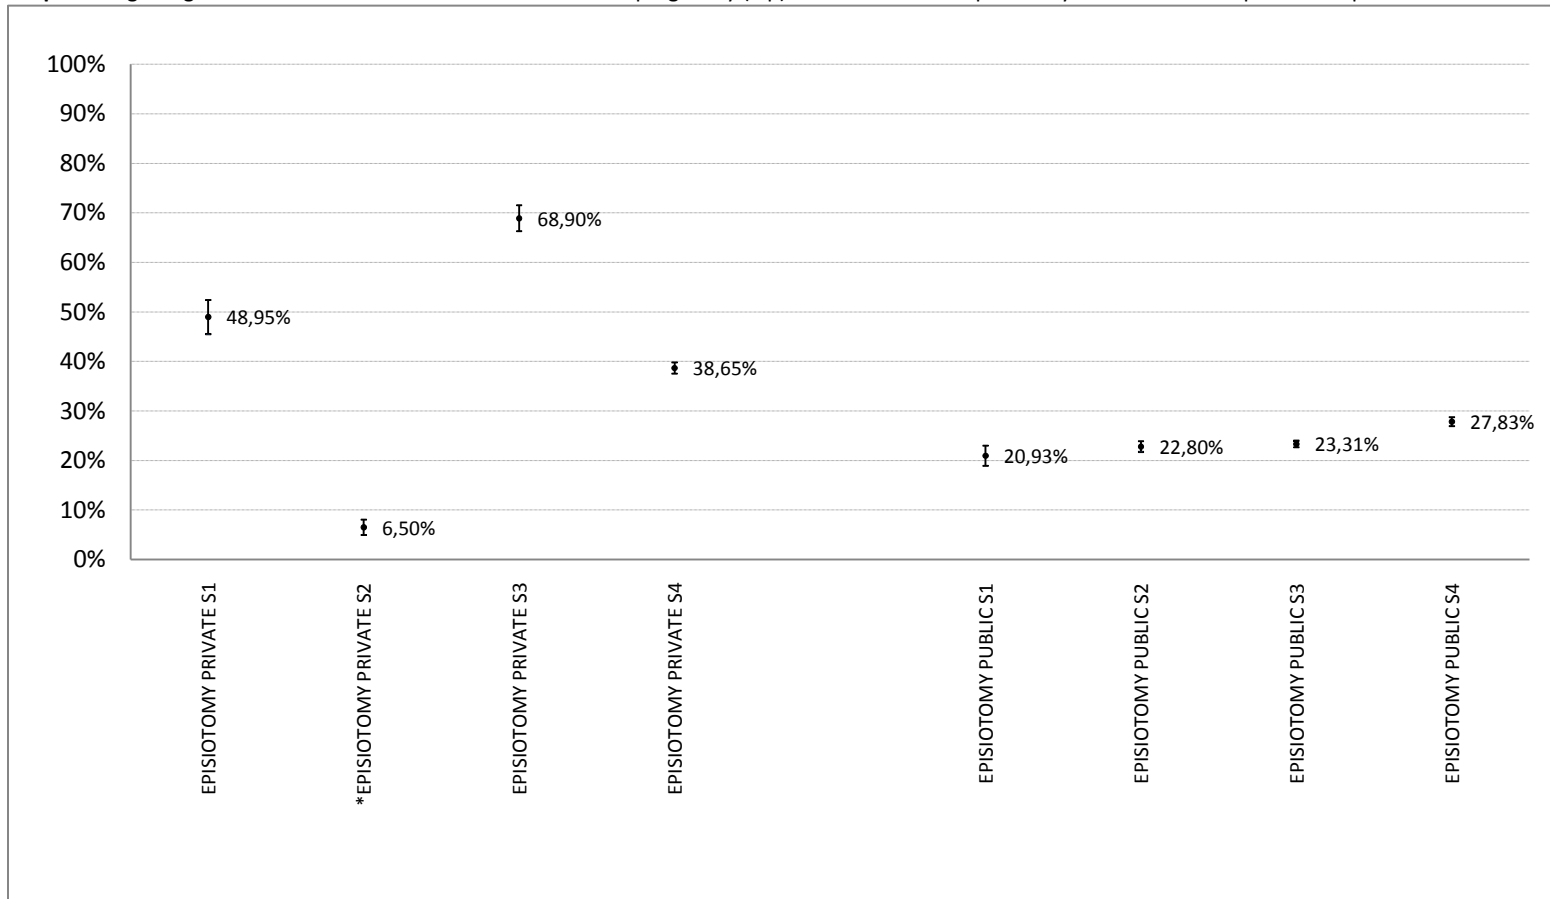

EPISIOTOMY PRIVATE S (N): Episiotomy in non-instrumental births. Private hospital stratum (N)

EPISIOTOMY PUBLIC S (N): episiotomy in non-instrumental births. Public hospital stratum (N)

\*EPISIOTOMY PRIVATE S2. Inconsistent reporting of episiotomy was identified in three hospitals in S2
